# Supplementary material for: Adaptive adipose tissue stromal plasticity in response to cold stress and antibody-based metabolic therapy
Source: PubMed Central journal article supplement (PMC6586812; doi:10.1038/s41598-019-45354-1), 2019-06-20
Supplement: 41598_2019_45354_MOESM1_ESM.pdf [file 41598_2019_45354_MOESM1_ESM.pdf]

Supplemental Information

**Adaptive adipose tissue stromal plasticity in response to cold stress and antibody-based metabolic therapy**

Joshua C. Chang, Steffen Durinck, Mark Z. Chen, Nadia Martinez-Martin, Jingli A. Zhang, Isabelle Lehoux, Hong Li, May Lin, Jiansheng Wu, Travis W. Bainbridge, James A. Ernst, Sree R. Ramani, Sairupa Paduchuri, Lance Kates, Margaret Solon, Matthew B. Buechler, Alessandra Castiglioni, Minh Thai, Beatrice Breart, Zora Modrusan, Andrew S. Peterson, Shannon J. Turley, Junichiro Sonoda

Fig. S1

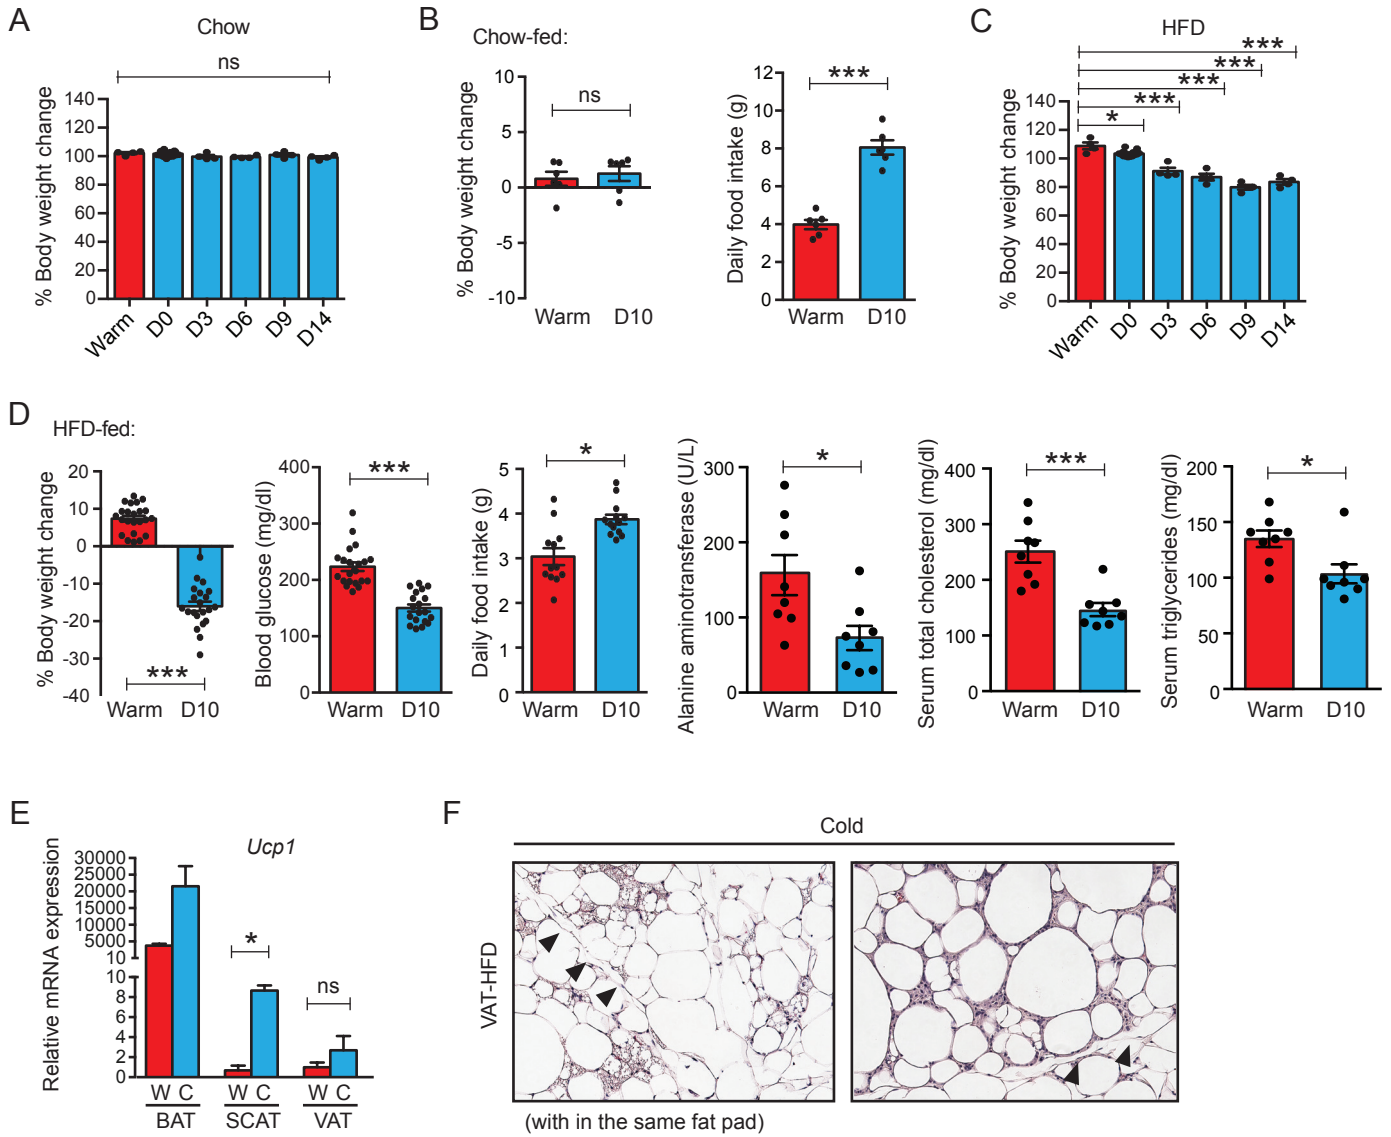

**Supplemental Figure S1. Cold exposure induces weight loss and browning in obese mice.** C57BL/6 mice on either **(A-B)** normal chow (10% kcal fat) or **(C-F)** HFD (60% kcal fat) were maintained at thermoneutrality (30°C, Warm) or exposed to 4°C (Cold) after adaptation at 18°C. **(A)** Body weight change % (from day -5) after exposed to 4°C cold for the indicated time, or control Warm mice maintained under thermoneutrality until day 14 (red) (N=4 mice per group). The starting body weights were  $29.8 \pm 0.2$  g. **(B)** Body weight changes and food intake of chow-fed mice during 4°C cold exposure for 10 days. (N=6 mice per group). **(C)** Body weight changes % (from day -5) of HFD-fed DIO mice after exposed to 4°C cold for the indicated time, or control Warm mice maintained under thermoneutrality until day 14 (red) (N=4 mice per group). The starting body weights were  $46.5 \pm 0.7$  g. **(D)** Body weight changes, blood glucose (N $\geq$ 18 mice per group), food intake (N=12 mice per group), serum total alanine aminotransferase, cholesterol, and triglycerides (N=8 mice per group) in DIO mice after 4°C cold exposure for 10 days. **(E)** qPCR analysis of *Ucp1* mRNA expression in BAT (N=3), SCAT, and VAT (N=5~6) in cold exposed (10 days) DIO mice. Statistical analysis was conducted without considering BAT samples. **(F)** H&E staining of cold exposed HFD-fed VAT. Both images are from the same fat pad. Triangles indicate fibrous septa. \* $P < 0.05$ , \*\* $P < 0.01$ , \*\*\* $P < 0.001$  by one-way ANOVA (A and C) or by student t-test (B, D and E). Data are shown as mean  $\pm$  SEM.

Fig. S2

A

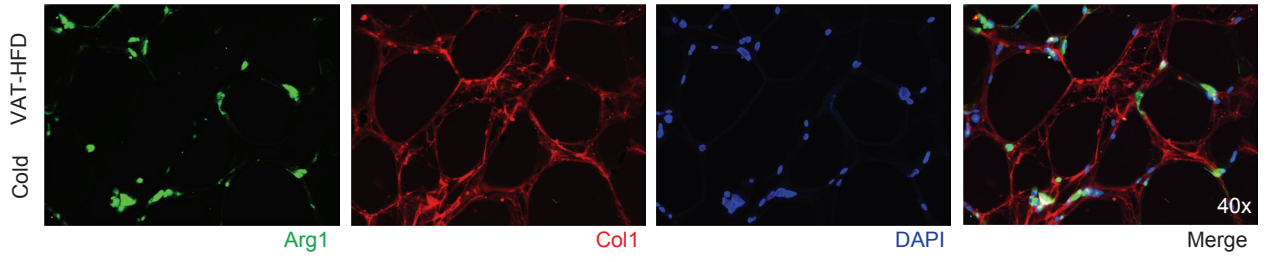

B

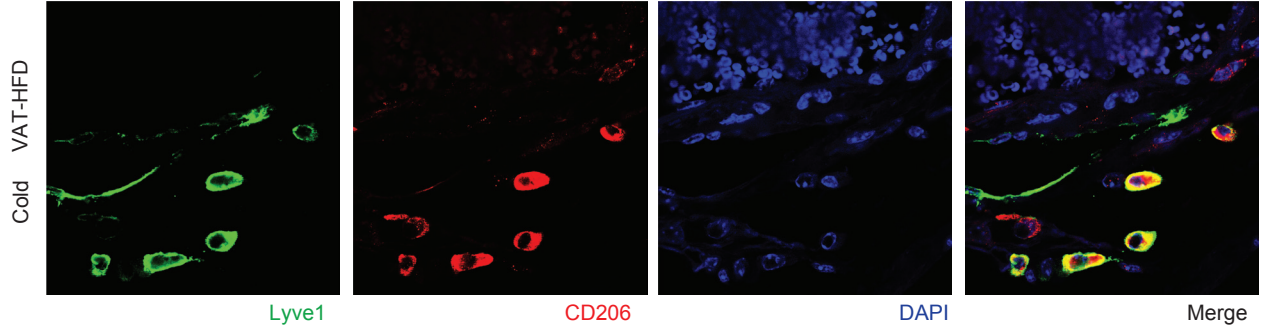

C

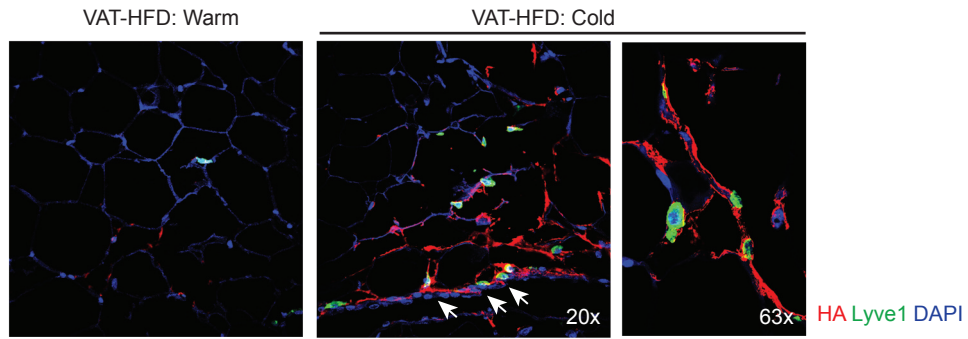

D

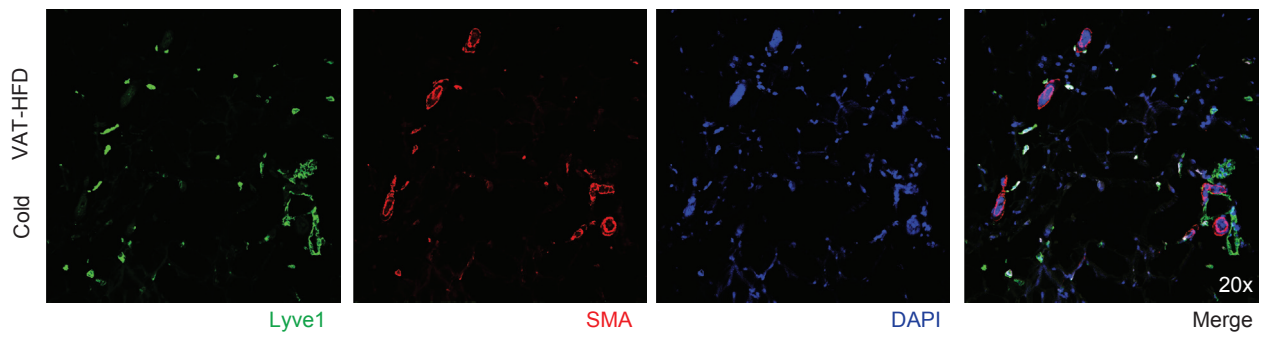

**Supplemental Figure S2. Cold exposure induces VAT remodeling in obese mice.** HFD-fed mice were maintained at 30°C (Warm) or exposed to 4°C for 10 days (Cold). **(A)** The same images as Figure 2B split into single channels. **(B)** The same images as Figure 2D split into single channels. **(C)** HA (red) and Lyve1 (green) IF. **(D)** The same images as Figure 2F split into single channels. DAPI (blue) stains cell nuclei in all IF.

Fig. S3

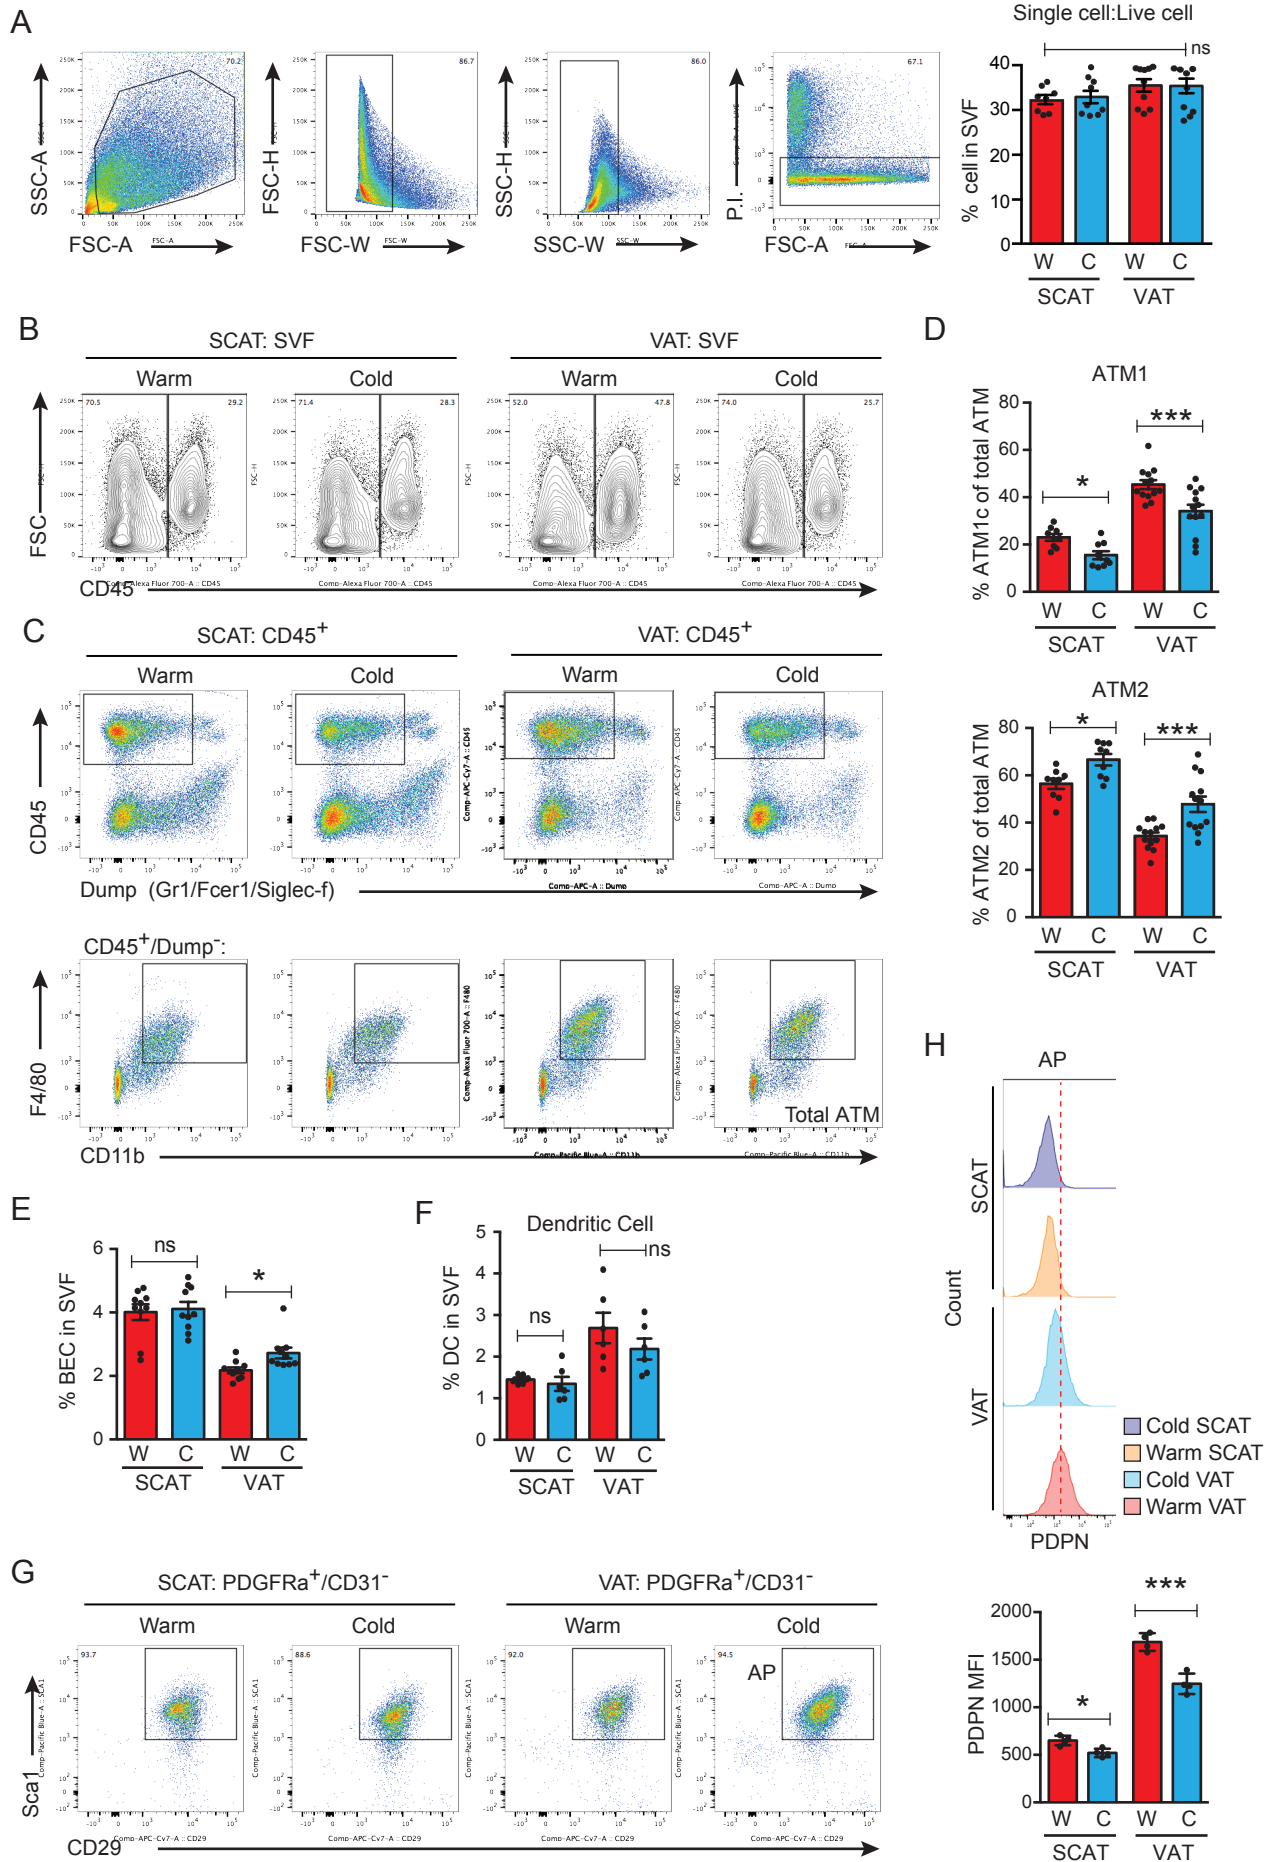

**Supplemental Figure S3. Cold exposure recruits ATM2.** HFD-fed mice were maintained at 30°C (Warm) or exposed to 4°C for 10 days (Cold). Flow cytometry analysis of SVF from both SCAT and VAT are shown. **(A)** The gating strategy of live cells in adipose tissue SVF. Frequencies of live cells in SVF at right. **(B)** Representative flow cytometry plots showing CD45<sup>+</sup> or CD45<sup>-</sup> cells in live SVF. **(C)** Representative flow cytometry plots showing CD45<sup>+</sup>/F4/80<sup>+</sup>/CD11b<sup>+</sup>/Dump<sup>-</sup> ATM in total live SVF. **(D)** Frequencies of CD11c<sup>+</sup>/CD206<sup>-</sup> ATM1 and CD11c<sup>-</sup>/CD206<sup>+</sup> ATM2 in total CD45<sup>+</sup>/F4/80<sup>+</sup>/CD11b<sup>+</sup>/Dump<sup>-</sup> ATM. **(E)** Frequencies of CD31<sup>+</sup>/PDPN<sup>-</sup>/CD45<sup>-</sup> BEC in total SVF. **(F)** Frequencies of CD45<sup>+</sup>/Dump<sup>-</sup>/F4/80<sup>-</sup>/CD11c<sup>+</sup> dendritic cells in total SVF. **(G)** Representative flow cytometry plots showing CD45<sup>-</sup>/CD31<sup>-</sup>/PDGFR $\alpha$ <sup>+</sup>/Sca1<sup>+</sup>/CD29<sup>+</sup> AP. **(H)** Flow cytometry histogram showing PDPN expression level in AP (left) and the quantification of the PDPN MFI (right). PDPN is an inflammation marker. \* $P < 0.05$ , \*\* $P < 0.01$ , \*\*\* $P < 0.001$  by student t-test. Data are shown as mean  $\pm$  SEM.

Fig. S4

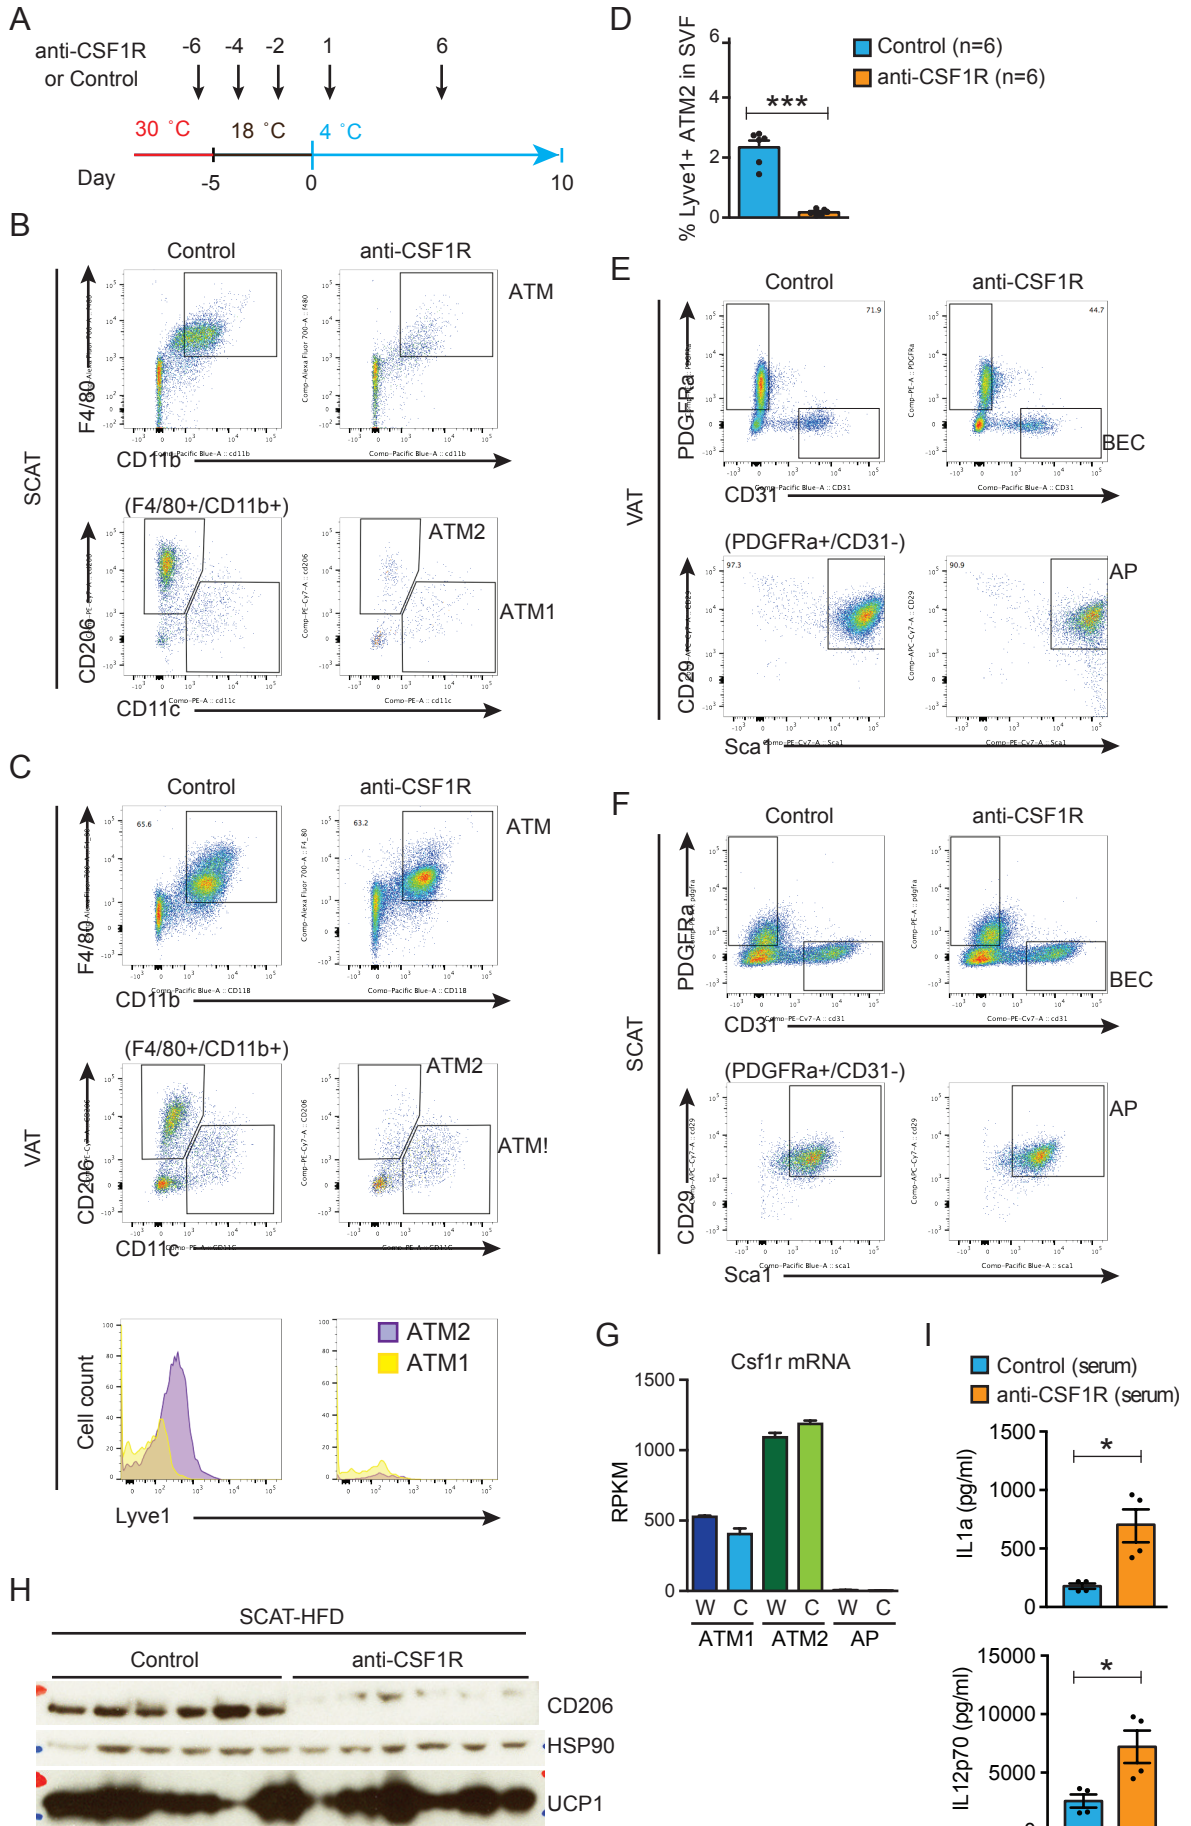



**Supplemental Figure S4. CSF1R signaling is required for cold-induced recruitment of ATM2. (A)**

The design for the anti-CSF1R experiment. HFD-fed C57BL/6 male mice maintained at thermoneutrality were i.p. dosed with 40 mg/kg anti-CSF1R antibody or isotype control at indicated times (arrows). All the mice were exposed to 4°C for 10 days after acclimation for 5 days at 18 °C. **(B)** Representative flow cytometry plots showing total ATM (top), ATM1 and ATM2 (bottom) in SCAT with or without anti-CSF1R treatment. **(C)** Representative flow cytometry plots showing total ATM (top), ATM1 and ATM2 (middle), and Lyve1 histograms in ATM1 and ATM2 populations (bottom) in VAT, with or without anti-CSF1R treatment. **(D)** Frequencies of Lyve1<sup>+</sup> ATM2 in total SVF with or without anti-CSF1R treatment. **(E)** Representative FACS plots showing AP in VAT with or without anti-CSF1R treatment. **(F)** Representative FACS plots showing AP in SCAT with or without anti-CSF1R treatment. **(G)** *Csf1r* mRNA expression in ATM1, ATM2, and AP in warm or cold-exposed VAT by RNA-seq (N=3). **(H)** Western blot analysis for CD206 and UCP1 expression in obese SCAT with or without anti-CSF1R treatment. HSP90 serves as loading control. **(I)** Cytokine concentrations in serum. \* $P < 0.05$ , \*\*\* $P < 0.001$  by student t-test. Data are shown as mean  $\pm$  SEM.

Fig. S5

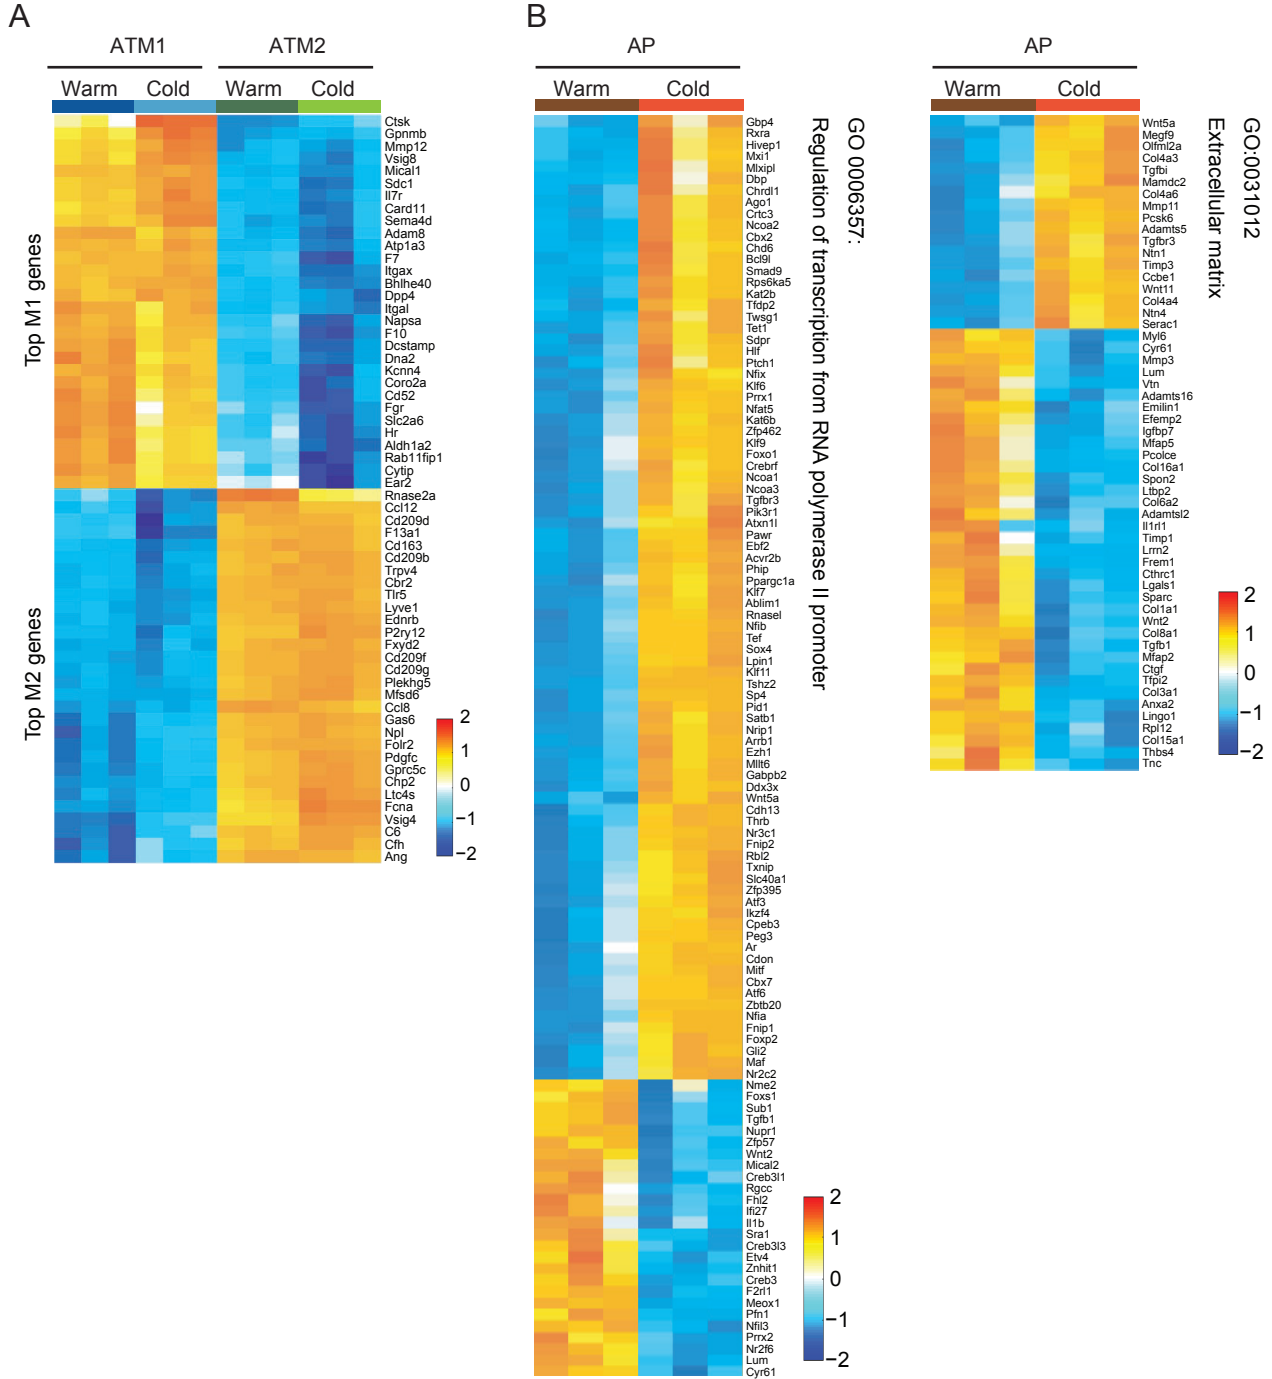

**Supplemental Figure S5. Heatmap showing ATM and AP gene expression in warm and cold**

**conditions.** (A) Heatmap showing top 20 ATM1 and ATM2 gene and their expression in warm and cold conditions. (B) Heatmap showing AP expression of various genes in indicated GO pathways. For heatmaps, expression data ( $\log_2(\text{RPKM})$ ) are standardized along each gene (row), and color scale corresponds to the relative expression level.

Fig. S6

A

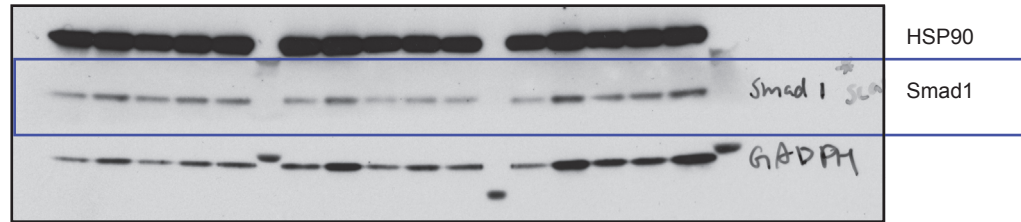

B

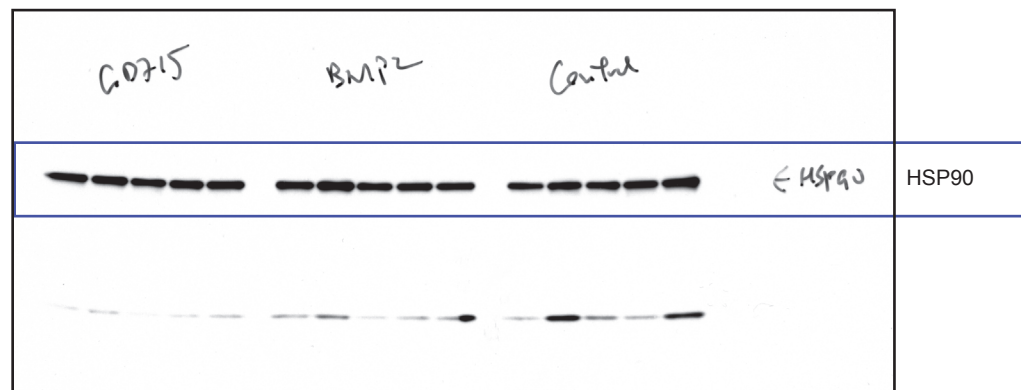

C

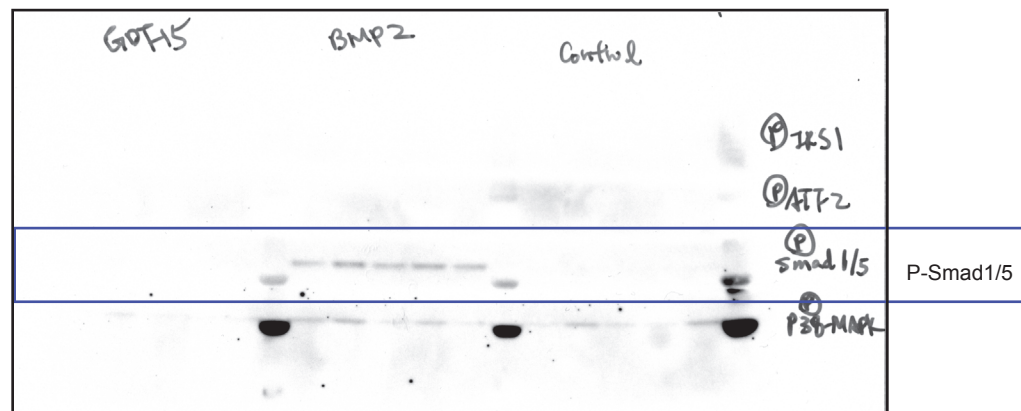

**Supplemental Figure S6.** Scanned raw images for the western blot images shown in Figure 5C.

Nitrocellulose membranes were cut into stripes for different antibody staining. (A) and (B) are the same blot with different exposure time. (C) is a different blot from (A) and (B), but from a gel loaded with the same amount of proteins, with the same order, and ran on the same time in the same gel tank. Blue boxes indicate the cropped images shown in Figure 5C. In Figure 5C, the images are flipped horizontally to show control samples on the left.

Fig. S7

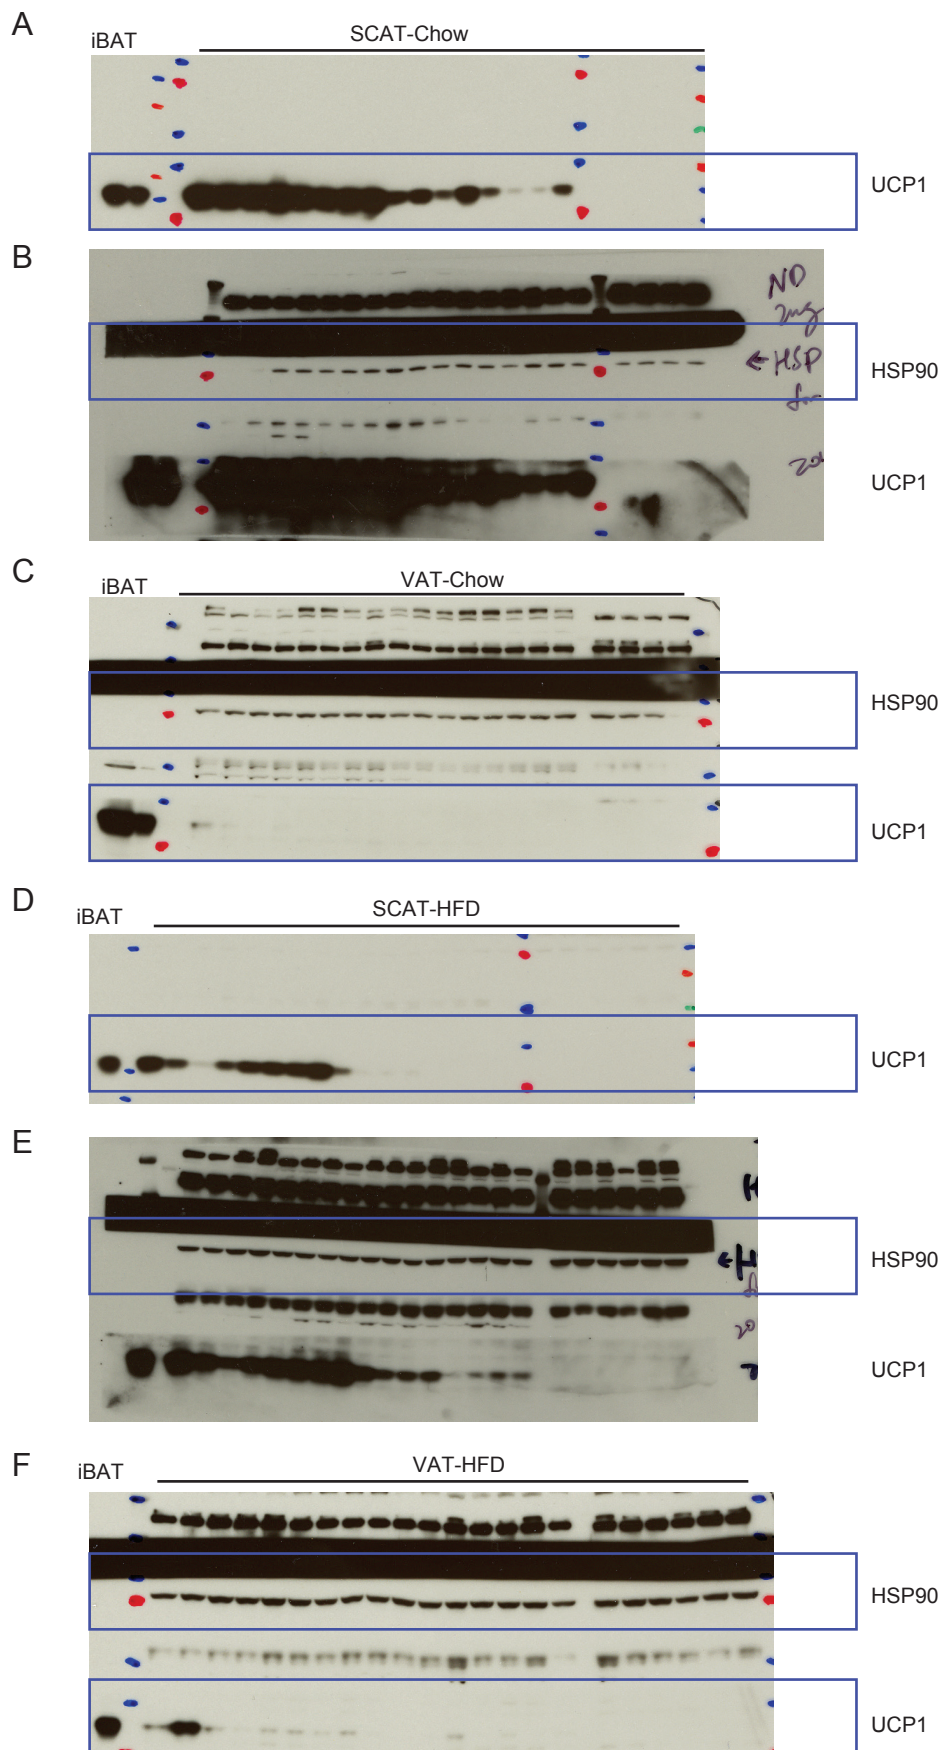

**Supplemental Figure S7.** Scanned raw images for the western blot images shown in Figure 1D and F. Nitrocellulose membranes were cut in stripes for different antibody staining. (A) and (B) are the same blots with different exposure time. (C) HSP90 and UCP1 expressions were shown in the same blot. (D) and (E) are the same blots with different exposure time. (F) HSP90 and UCP1 expressions were shown in the same blot. Blue boxes indicate the cropped images shown in Figure 1D and F. In Figure 1D and F, the images are flipped horizontally to show control samples on the left.

Fig. S8

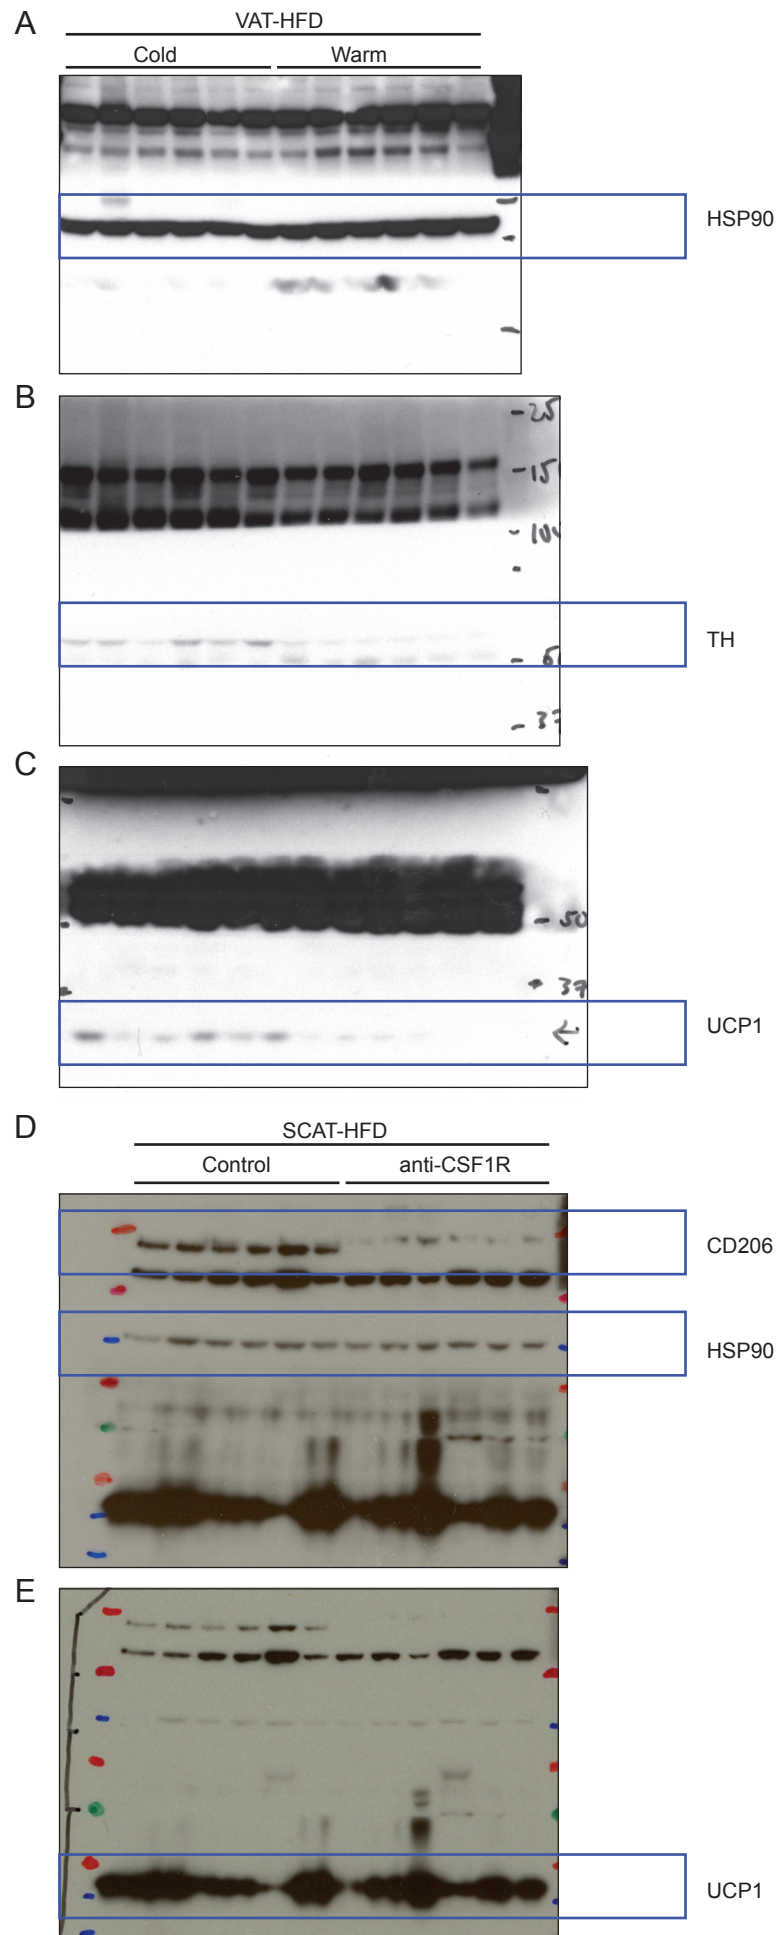



**Supplemental Figure S8.** Scanned raw images for the western blot images shown in Figure 2I and Supplemental Figure S4H. Nitrocellulose membranes were cut in stripes for different antibody staining. (A) gel was processed and loaded the same amount of proteins as (B) and (C). (B) and (C) are the same blots with different exposure time. (A) HSP90, (B) TH, and (C) UCP1 expressions were shown. (D) and (E) are the same blots with different exposure time. (D) HSP90 and CD206, and (E) UCP1 expressions were shown in the same blot. Blue boxes indicate the cropped images shown in Figure 2I and Supplemental Figure S4H. In Figure 2I, the images are flipped horizontally to show control samples on the left.

Fig. S9

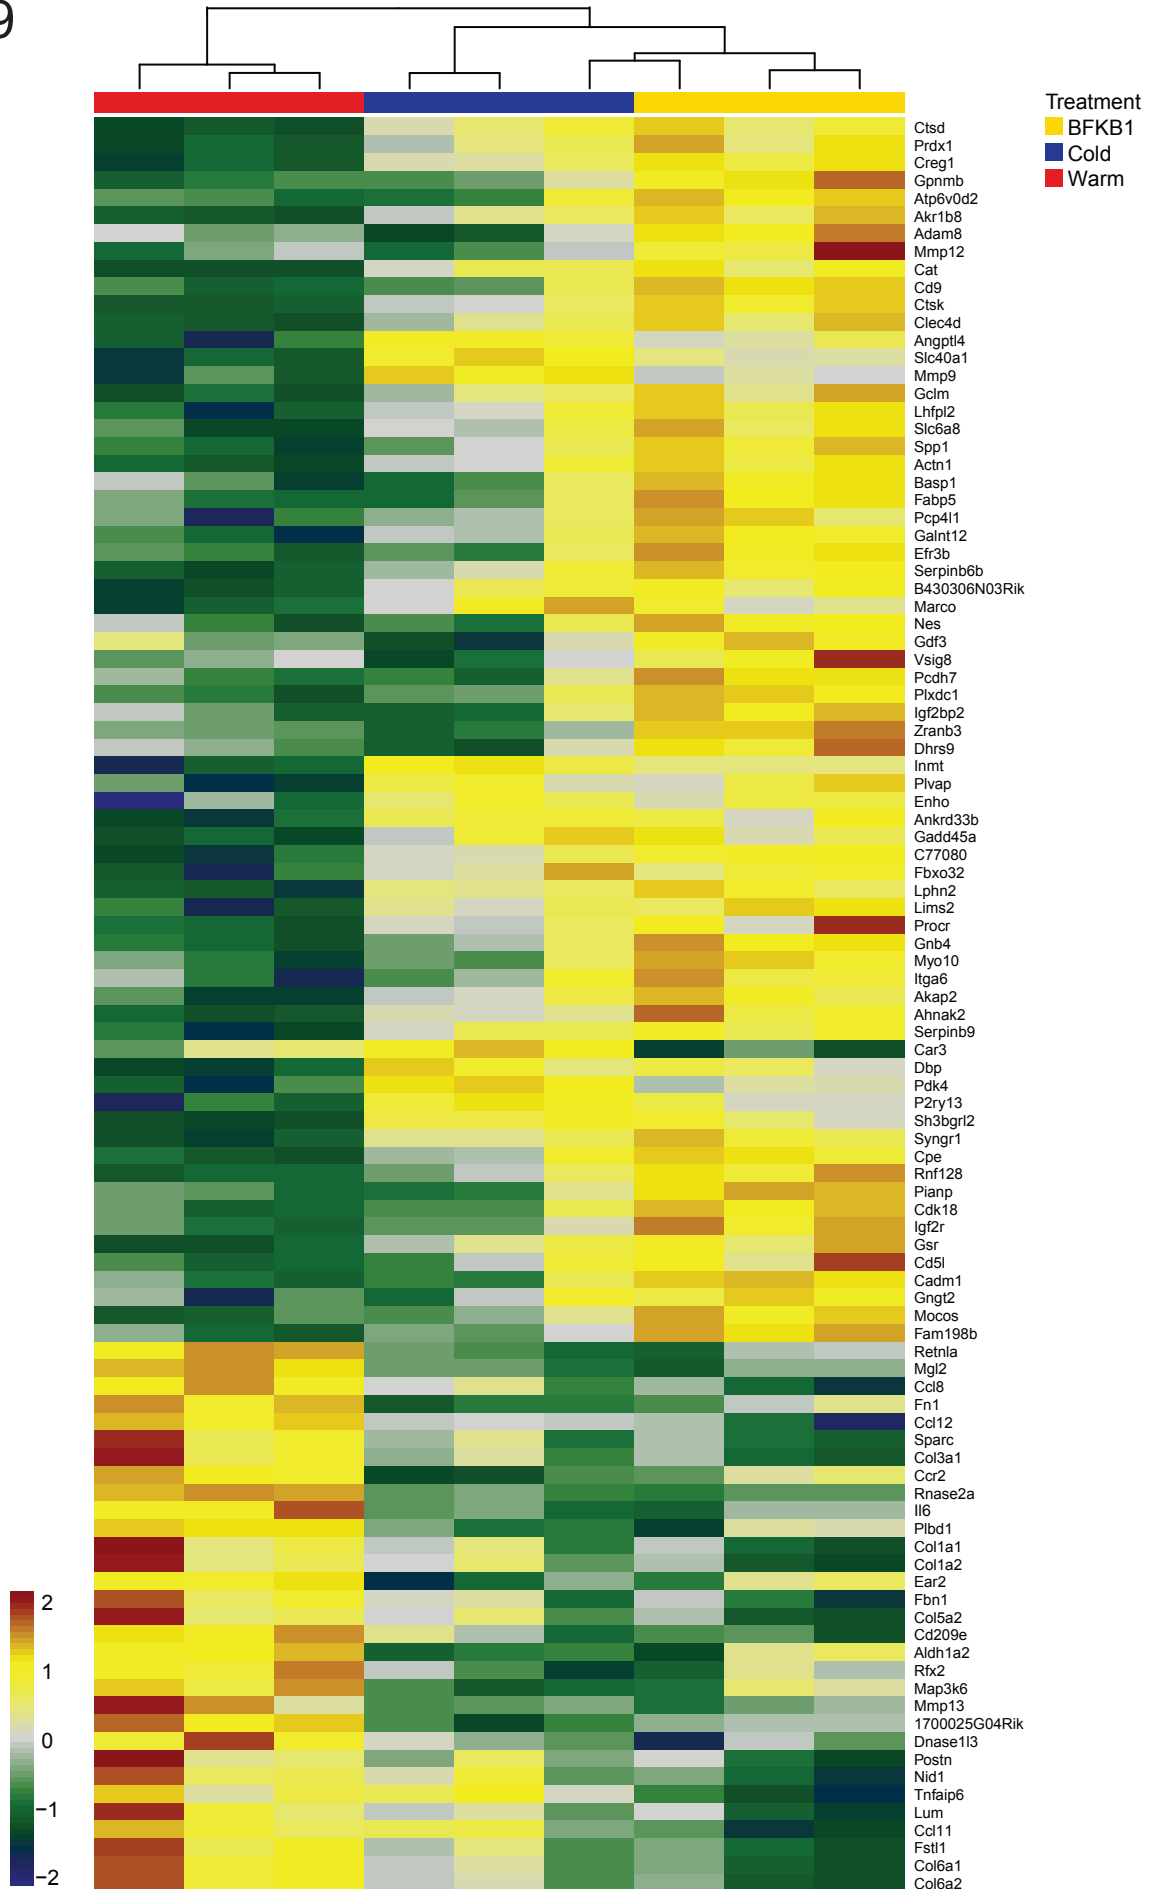

**Supplemental Figure S9.** Heatmap with gene names shown in Figure 6J.

Table 1. Reagent used for the study

| REAGENT                                       | SOURCE                    | IDENTIFIER  |
|-----------------------------------------------|---------------------------|-------------|
| <b>Antibodies and related reagents</b>        |                           |             |
| Anti-CD45 MicroBeads                          | Miltenyi Biotec           | 130-052-301 |
| Anti-CD31 MicroBeads                          | Miltenyi Biotec           | 130-097-418 |
| Purified Rat Anti-Mouse CD16/CD32 (Fc Block™) | BD Biosciences            | 553141      |
| Anti-CD45                                     | BioLegend                 | 30-F11      |
| Anti-CD31                                     | BioLegend                 | 390         |
| Anti-Podoplanin                               | BioLegend                 | 8.1.1       |
| Anti-PDGFR $\alpha$                           | BioLegend                 | AP5         |
| Anti-Lyve1                                    | BioLegend                 | ALY7        |
| Anti-Lyve1                                    | R&D Systems               | 223322      |
| Anti-CD11c                                    | BioLegend                 | N418        |
| Anti-CD206                                    | BioLegend                 | C068C2      |
| Anti-Gr1                                      | BioLegend                 | RB6-8C5     |
| Anti-FceR1                                    | BioLegend                 | MAR-1       |
| Anti-Siglec-F                                 | BDbiosciences             | E50-2440    |
| Anti-F4/80                                    | BioLegend                 | BM8         |
| Anti-CD11b                                    | BioLegend                 | M1/70       |
| Anti-CD29                                     | BioLegend                 | HMb1-1      |
| Anti-Sca-1                                    | BioLegend                 | E13-161.7   |
| Anti-Class III $\beta$ -tubulin (Tubb3)       | BioLegend                 | AA10        |
| Anti-CD206                                    | Abcam                     | ab64693     |
| Anti-UCP1                                     | Abcam                     | ab23841     |
| Anti-TH                                       | EMD Millipore             | AB152       |
| Anti-TH                                       | EMD Millipore             | MAB318      |
| Anti-Smad1                                    | Cell Signaling Technology | 9743        |
| Anti-Phospho-Smad1/5                          | Cell Signaling Technology | 9516        |
| Anti-mouse IgG HRP-linked                     | Cell Signaling Technology | 7076        |
| Anti-rabbit IgG HRP-linked                    | Cell Signaling Technology | 7074        |
| Anti-Lyve-1                                   | R&D Systems               | AF2125      |
| Anti-CD206                                    | R&D Systems               | AF2535      |
| Anti-F4/80                                    | BioRad                    | MCA497G     |
| Anti-Coll                                     | Abcam                     | ab21286     |
| Anti- $\alpha$ SMA                            | Sigma                     | c6198       |
| Anti-Arg1                                     | Abcam                     | ab60167     |
| Anti-Arg1                                     | Abcam                     | ab124917    |
| Anti-TUBB3                                    | Abcam                     | ab18207     |
| Anti-Ret                                      | Abcam                     | Ab134100    |
| Anti-HSP90                                    | Cell Signaling Technology | #4877       |
| Anti-FGFR1/KLB bispecific antibody            | Genentech                 | bFKB1       |
| Anti-Ragweed (RW, isotype control)            | Genentech                 |             |
| Trastuzumab (Herceptin, isotype control)      | Genentech                 |             |
| Anti-mouse CSF1R                              | BioXCell                  | BE0213      |

|                                                                          |                   |                         |
|--------------------------------------------------------------------------|-------------------|-------------------------|
| isotype control Rat IgG2a                                                | BioXCell          | BE0089                  |
| Picro Sirius Red                                                         | Abcam             | ab150681                |
| DAPI                                                                     | Thermo Scientific | 62247                   |
| Hyaluronan binding protein (HABP)                                        | EMD Millipore     | #385911                 |
| <b>Recombinant Proteins</b>                                              |                   |                         |
| Recombinant human/mouse BMP2                                             | R&D Systems       | 355-BM                  |
| Recombinant human GDNF                                                   | R&D Systems       | 212-GD                  |
| Recombinant human His-GDF15, CHO                                         | Genentech         | PUR121320               |
| Recombinant human Fc-GDF15, HEK293T                                      | Genentech         | PUR125052               |
| <b>qPCR primers</b>                                                      |                   |                         |
| TBP_F: ATCAACATCTCAGCAACCCA<br>TBP_R: TTGAAGCTGCGGTACAATTC               | Genentech         | N/A                     |
| Pparg1a_F: CCCTGCCATTGTTAAGACC<br>Pparg1a_R: TGCTGCTGTTCCCTGTTTTTC       | Genentech         | N/A                     |
| Scd1_F: CTGTACGGGATCATACTGGTTC<br>Scd1_R: GCCGTGCCTTGTAAGTTCTG           | Genentech         | N/A                     |
| Rpl13A_F: GAAGGCATCAACATTTCTGGAA<br>Rpl13A_R: CAGTGCGCCAGAAAATGC         | IDT               | Mm.PT.58.43547045<br>.g |
| Tbp_F: TGTATCTACCGTGAATCTTGCC<br>Tbp_R: CCAGAACTGAAAATCAACGCAG           | IDT               | Mm.PT.39a.2221483<br>9  |
| Pparg1a_F: TGCAGCCAAGACTCTGTATG<br>Pparg1a_R:<br>TCAGAAAGGTCAAGTTCAGGAAG | IDT               | Mm.PT.58.28716430       |
| Ucp1_F: CAAATCAGCTTTGCCTCACTC<br>Ucp1_R: CACACCTCCAGTCATTAAGCC           | IDT               | Mm.PT.58.7088262        |
| <b>Plasmid DNA</b>                                                       |                   |                         |
| pFA2-ELK1                                                                | Agilent           | 219062                  |
| pFR-luc                                                                  | Agilent           | 219050                  |
| pRL-SV40                                                                 | Promega           | E2231                   |
| CMV-Human Ret51                                                          | Genentech         | J4006                   |
| CMV-Human Gfral                                                          | Genentech         | DNA751304               |
| CMV-Human Gfra1                                                          | Genentech         | DNA365770               |
